# Supplementary material for: Protein Targets of Acetaminophen Covalent Binding in Rat and Mouse Liver Studied by LC-MS/MS
Source: Front Chem. 2021 Aug 20;9:736788. doi: 10.3389/fchem.2021.736788 (PMC8417805; doi:10.3389/fchem.2021.736788)
Supplement: Supplementary file 5 [file Table1.XLSX]

## Sheet: Fr2
Q1	Q3	RT	ID
793.398	948.5	32.55	O09171_AGAAIVGVNCHFDPSTSLQTIK_3+_F1
793.398	974.6	32.55	O09171_AGAAIVGVNCHFDPSTSLQTIK_3+_F2
793.398	998	32.55	O09171_AGAAIVGVNCHFDPSTSLQTIK_3+_F3
848.736	899.4	31.28	O09171_QVADEGDALVAGGVSQTPSYLSCK_3+_F1
848.736	946.4	31.28	O09171_QVADEGDALVAGGVSQTPSYLSCK_3+_F2
848.736	1047.5	31.28	O09171_QVADEGDALVAGGVSQTPSYLSCK_3+_F3
605.78	797.4	13.92	O09171_VNEAACDIAR_2+_F1
605.78	868.4	13.92	O09171_VNEAACDIAR_2+_F2
605.78	997.4	13.92	O09171_VNEAACDIAR_2+_F3
607.634	769.4	36.67	P29147_AVLVTGCDSGFGFSLAK_3+_F1
607.634	826.4	36.67	P29147_AVLVTGCDSGFGFSLAK_3+_F2
607.634	913.4	36.67	P29147_AVLVTGCDSGFGFSLAK_3+_F3
696.816	889.4	33.62	P29147_FGVEAFSDCLR_2+_F1
696.816	960.4	33.62	P29147_FGVEAFSDCLR_2+_F2
696.816	1089.5	33.62	P29147_FGVEAFSDCLR_2+_F3
464.88	540.3	33.62	P29147_FGVEAFSDCLR_3+_F1
464.88	655.3	33.62	P29147_FGVEAFSDCLR_3+_F2
464.88	742.3	33.62	P29147_FGVEAFSDCLR_3+_F3
1137.85	880.5	47.65	P29147_METYCNSGSTDTSSVINAVTHALTAATPYTR_3+_F1
1137.85	1201.6	47.65	P29147_METYCNSGSTDTSSVINAVTHALTAATPYTR_3+_F2
1137.85	1217.6	47.65	P29147_METYCNSGSTDTSSVINAVTHALTAATPYTR_3+_F3
877.917	921.4	24.08	P29147_TIQLNVCNSEEVEK_2+_F1
877.917	1086.4	24.08	P29147_TIQLNVCNSEEVEK_2+_F2
877.917	1185.5	24.08	P29147_TIQLNVCNSEEVEK_2+_F3
756.345	845.4	19.9	Q562C4_VTCVDPNPNFEK_2+_F1
756.345	960.4	19.9	Q562C4_VTCVDPNPNFEK_2+_F2
756.345	1059.5	19.9	Q562C4_VTCVDPNPNFEK_2+_F3
784.844	832.4	12.82	P18418_HEQNIDCGGGYVK_2+_F1
784.844	947.4	12.82	P18418_HEQNIDCGGGYVK_2+_F2
784.844	1174.5	12.82	P18418_HEQNIDCGGGYVK_2+_F3
523.565	580.3	12.82	P18418_HEQNIDCGGGYVK_3+_F1
523.565	832.4	12.82	P18418_HEQNIDCGGGYVK_3+_F2
523.565	947.4	12.82	P18418_HEQNIDCGGGYVK_3+_F3
576.777	617.3	13.97	P11884_LLCGGGAAADR_2+_F1
576.777	674.3	13.97	P11884_LLCGGGAAADR_2+_F2
576.777	926.4	13.97	P11884_LLCGGGAAADR_2+_F3
656.324	791.4	28.11	P10860_CAVVDVPFGGAK_2+_F1
656.324	889.5	28.11	P10860_CAVVDVPFGGAK_2+_F2
656.324	988.5	28.11	P10860_CAVVDVPFGGAK_2+_F3
1097.49	1153.5	32.23	P10860_CVGVGESDGSIWNPDGIDPK_2+_F1
1097.49	1154.6	32.23	P10860_CVGVGESDGSIWNPDGIDPK_2+_F2
1097.49	1241.6	32.23	P10860_CVGVGESDGSIWNPDGIDPK_2+_F3
731.997	855.4	32.23	P10860_CVGVGESDGSIWNPDGIDPK_3+_F1
731.997	1041.5	32.23	P10860_CVGVGESDGSIWNPDGIDPK_3+_F2
731.997	1153.5	32.23	P10860_CVGVGESDGSIWNPDGIDPK_3+_F3
1193.08	602.3	40.57	P10860_VYEGSILEADCDILIPAASEK_2+_F1
1193.08	715.4	40.57	P10860_VYEGSILEADCDILIPAASEK_2+_F2
1193.08	762.4	40.57	P10860_VYEGSILEADCDILIPAASEK_2+_F3
464.197	481.2	3.95	P04041_CEVNGEK_2+_F1
464.197	546.3	3.95	P04041_CEVNGEK_2+_F2
464.197	675.3	3.95	P04041_CEVNGEK_2+_F3
1036.22	1076.5	42.08	P04797_GILGYTEDQVVSCDFNSNSHSSTFDAGAGIALNDNFVK_4+_F1
1036.22	1090.6	42.08	P04797_GILGYTEDQVVSCDFNSNSHSSTFDAGAGIALNDNFVK_4+_F2
1036.22	1175.6	42.08	P04797_GILGYTEDQVVSCDFNSNSHSSTFDAGAGIALNDNFVK_4+_F3
824.922	855.4	31.33	P04797_VPTPNVSVVDLTCR_2+_F1
824.922	1041.5	31.33	P04797_VPTPNVSVVDLTCR_2+_F2
824.922	1140.6	31.33	P04797_VPTPNVSVVDLTCR_2+_F3
550.284	641.3	31.33	P04797_VPTPNVSVVDLTCR_3+_F1
550.284	756.3	31.33	P04797_VPTPNVSVVDLTCR_3+_F2
550.284	794.4	31.33	P04797_VPTPNVSVVDLTCR_3+_F3
597.298	696.4	30.2	P13444_ICDQISDAVLDAHLK_3+_F1
597.298	795.5	30.2	P13444_ICDQISDAVLDAHLK_3+_F2
597.298	995.4	30.2	P13444_ICDQISDAVLDAHLK_3+_F3
773.884	913.5	37.38	Q8VIF7_EEIVYLPCIYR_2+_F1
773.884	1076.5	37.38	Q8VIF7_EEIVYLPCIYR_2+_F2
773.884	1175.6	37.38	Q8VIF7_EEIVYLPCIYR_2+_F3
516.259	634.3	37.38	Q8VIF7_EEIVYLPCIYR_3+_F1
516.259	703.3	37.38	Q8VIF7_EEIVYLPCIYR_3+_F2
516.259	800.4	37.38	Q8VIF7_EEIVYLPCIYR_3+_F3
842.401	888.5	32.47	Q8VIF7_FLHDPDATQGFVGCALSSNIQR_3+_F1
842.401	1140.5	32.47	Q8VIF7_FLHDPDATQGFVGCALSSNIQR_3+_F2
842.401	1197.6	32.47	Q8VIF7_FLHDPDATQGFVGCALSSNIQR_3+_F3
839.756	909.5	34.5	Q8VIF7_GGSVQVLEDQELTCQPEPLVVK_3+_F1
839.756	995.5	34.5	Q8VIF7_GGSVQVLEDQELTCQPEPLVVK_3+_F2
839.756	1142.5	34.5	Q8VIF7_GGSVQVLEDQELTCQPEPLVVK_3+_F3
526.193	694.2	6.81	P27867_CDPNDQNP_2+_F1
526.193	822.3	6.81	P27867_CDPNDQNP_2+_F2
526.193	936.3	6.81	P27867_CDPNDQNP_2+_F3
894.891	909.5	15.38	P28037_CPQSEEGATYEGIQK_2+_F1
894.891	966.5	15.38	P28037_CPQSEEGATYEGIQK_2+_F2
894.891	1095.5	15.38	P28037_CPQSEEGATYEGIQK_2+_F3
668.307	723.3	30.96	P28037_ECEVLPDDTVSTLYNR_3+_F1
668.307	753.4	30.96	P28037_ECEVLPDDTVSTLYNR_3+_F2
668.307	852.5	30.96	P28037_ECEVLPDDTVSTLYNR_3+_F3
626.596	765.4	28.86	P28037_GEDDESECVINYVEK_3+_F1
626.596	864.5	28.86	P28037_GEDDESECVINYVEK_3+_F2
626.596	1014.3	28.86	P28037_GEDDESECVINYVEK_3+_F3
520.235	553.2	10.01	P28037_GENCIAAGR_2+_F1
520.235	739.4	10.01	P28037_GENCIAAGR_2+_F2
520.235	853.4	10.01	P28037_GENCIAAGR_2+_F3
530.25	718.3	13.14	P28037_LVEYCQR_2+_F1
530.25	847.3	13.14	P28037_LVEYCQR_2+_F2
530.25	946.4	13.14	P28037_LVEYCQR_2+_F3
799.4	927.4	37.8	P28037_SPLIIFADCDLNK_2+_F1
799.4	1074.5	37.8	P28037_SPLIIFADCDLNK_2+_F2
799.4	1187.5	37.8	P28037_SPLIIFADCDLNK_2+_F3
972.803	1061.5	38.5	P28037_TYNTINPTDGSVICQVSLAQVSDVDK_3+_F1
972.803	1105.5	38.5	P28037_TYNTINPTDGSVICQVSLAQVSDVDK_3+_F2
972.803	1177.6	38.5	P28037_TYNTINPTDGSVICQVSLAQVSDVDK_3+_F3
1057.2	1139.6	52.55	P28037_YQALGAELNVLPFCSQFIPMEVINAPR_3+_F1
1057.2	1162.6	52.55	P28037_YQALGAELNVLPFCSQFIPMEVINAPR_3+_F2
1057.2	1172.6	52.55	P28037_YQALGAELNVLPFCSQFIPMEVINAPR_3+_F3
1054.83	1109.5	51.28	P46953_VTMGGQCVALAPDDSLLVPAGFSYMWER_3+_F1
1054.83	1180.5	51.28	P46953_VTMGGQCVALAPDDSLLVPAGFSYMWER_3+_F2
1054.83	1243.6	51.28	P46953_VTMGGQCVALAPDDSLLVPAGFSYMWER_3+_F3
569.8	660.4	31.26	P30904_LLCGLLSDR_2+_F1
569.8	762.4	31.26	P30904_LLCGLLSDR_2+_F2
569.8	912.4	31.26	P30904_LLCGLLSDR_2+_F3
874.403	966.4	27.48	P13255_NYDYILSTGCAPPGK_2+_F1
874.403	1076.5	27.48	P13255_NYDYILSTGCAPPGK_2+_F2
874.403	1192.6	27.48	P13255_NYDYILSTGCAPPGK_2+_F3
848.736	946.4	31.28	O09171_QVADEGDALVAGGVSQTPSYLSCK_3+_F1
848.736	1047.5	31.28	O09171_QVADEGDALVAGGVSQTPSYLSCK_3+_F2
848.736	1069.5	31.28	O09171_QVADEGDALVAGGVSQTPSYLSCK_3+_F3
745.004	946.5	38.98	P49890_P52844_NNPCTNYSMLPETMIDLK_3+_F1
745.004	1059.6	38.98	P49890_P52844_NNPCTNYSMLPETMIDLK_3+_F2
745.004	1174.4	38.98	P49890_P52844_NNPCTNYSMLPETMIDLK_3+_F3
1117	1117	39.07	P49890_P52844_NNPCTNYSMLPETMIDLK_2+_F1
1117	1174.4	39.07	P49890_P52844_NNPCTNYSMLPETMIDLK_2+_F2
1117	1190.6	39.07	P49890_P52844_NNPCTNYSMLPETMIDLK_2+_F3
889.789	919.5	53.12	P14942_DGCLLFGQVPLVEIDGMLLTQTR_3+_F1
889.789	1034.5	53.12	P14942_DGCLLFGQVPLVEIDGMLLTQTR_3+_F2
889.789	1082.5	53.12	P14942_DGCLLFGQVPLVEIDGMLLTQTR_3+_F3
496.877	562.2	4.49	P04905_HHLCGETEEER_3+_F1
496.877	663.3	4.49	P04905_HHLCGETEEER_3+_F2
496.877	849.4	4.49	P04905_HHLCGETEEER_3+_F3
744.812	849.4	4.53	P04905_HHLCGETEEER_2+_F1
744.812	1101.4	4.53	P04905_HHLCGETEEER_2+_F2
744.812	1214.5	4.53	P04905_HHLCGETEEER_2+_F3
733.304	849.4	8.67	P08010_HNLCGETEEER_2+_F1
733.304	1101.4	8.67	P08010_HNLCGETEEER_2+_F2
733.304	1214.5	8.67	P08010_HNLCGETEEER_2+_F3
854.914	1010.5	31.85	P00176_P04167_P08683_IQEEAQCLVEELR_2+_F1
854.914	1138.6	31.85	P00176_P04167_P08683_IQEEAQCLVEELR_2+_F2
854.914	1209.6	31.85	P00176_P04167_P08683_IQEEAQCLVEELR_2+_F3

## Sheet: Fr3
Q1	Q3	RT	ID
1189.59	948.5	32.72	O09171_AGAAIVGVNCHFDPSTSLQTIK_2+_F1
1189.59	974.6	32.72	O09171_AGAAIVGVNCHFDPSTSLQTIK_2+_F2
1189.59	1236.6	32.72	O09171_AGAAIVGVNCHFDPSTSLQTIK_2+_F3
793.398	948.5	32.72	O09171_AGAAIVGVNCHFDPSTSLQTIK_3+_F1
793.398	974.6	32.72	O09171_AGAAIVGVNCHFDPSTSLQTIK_3+_F2
793.398	998	32.72	O09171_AGAAIVGVNCHFDPSTSLQTIK_3+_F3
848.736	899.4	31.47	O09171_QVADEGDALVAGGVSQTPSYLSCK_3+_F1
848.736	946.4	31.47	O09171_QVADEGDALVAGGVSQTPSYLSCK_3+_F2
848.736	1047.5	31.47	O09171_QVADEGDALVAGGVSQTPSYLSCK_3+_F3
605.78	797.4	14.1	O09171_VNEAACDIAR_2+_F1
605.78	868.4	14.1	O09171_VNEAACDIAR_2+_F2
605.78	997.4	14.1	O09171_VNEAACDIAR_2+_F3
696.816	889.4	33.77	P29147_FGVEAFSDCLR_2+_F1
696.816	960.4	33.77	P29147_FGVEAFSDCLR_2+_F2
696.816	1089.5	33.77	P29147_FGVEAFSDCLR_2+_F3
464.88	540.3	33.77	P29147_FGVEAFSDCLR_3+_F1
464.88	655.3	33.77	P29147_FGVEAFSDCLR_3+_F2
464.88	742.3	33.77	P29147_FGVEAFSDCLR_3+_F3
1137.85	880.5	47.78	P29147_METYCNSGSTDTSSVINAVTHALTAATPYTR_3+_F1
1137.85	1201.6	47.78	P29147_METYCNSGSTDTSSVINAVTHALTAATPYTR_3+_F2
1137.85	1217.6	47.78	P29147_METYCNSGSTDTSSVINAVTHALTAATPYTR_3+_F3
853.642	880.5	47.8	P29147_METYCNSGSTDTSSVINAVTHALTAATPYTR_4+_F1
853.642	943.5	47.8	P29147_METYCNSGSTDTSSVINAVTHALTAATPYTR_4+_F2
853.642	993.5	47.8	P29147_METYCNSGSTDTSSVINAVTHALTAATPYTR_4+_F3
877.917	921.4	24.21	P29147_TIQLNVCNSEEVEK_2+_F1
877.917	1086.4	24.21	P29147_TIQLNVCNSEEVEK_2+_F2
877.917	1185.5	24.21	P29147_TIQLNVCNSEEVEK_2+_F3
756.345	845.4	20.08	Q562C4_VTCVDPNPNFEK_2+_F1
756.345	960.4	20.08	Q562C4_VTCVDPNPNFEK_2+_F2
756.345	1059.5	20.08	Q562C4_VTCVDPNPNFEK_2+_F3
420.687	495.2	4.58	P51647_LECGGGR_2+_F1
420.687	598.2	4.58	P51647_LECGGGR_2+_F2
420.687	727.3	4.58	P51647_LECGGGR_2+_F3
1160.88	1179.6	48.51	P15999_YTIVVSATASDAAPLQYLAPYSGCSMGEYFR_3+_F1
1160.88	1187	48.51	P15999_YTIVVSATASDAAPLQYLAPYSGCSMGEYFR_3+_F2
1160.88	1198.5	48.51	P15999_YTIVVSATASDAAPLQYLAPYSGCSMGEYFR_3+_F3
576.777	617.3	14.14	P11884_LLCGGGAAADR_2+_F1
576.777	674.3	14.14	P11884_LLCGGGAAADR_2+_F2
576.777	926.4	14.14	P11884_LLCGGGAAADR_2+_F3
656.324	791.4	27.79	P10860_CAVVDVPFGGAK_2+_F1
656.324	889.5	27.79	P10860_CAVVDVPFGGAK_2+_F2
656.324	988.5	27.79	P10860_CAVVDVPFGGAK_2+_F3
1097.49	1153.5	32.4	P10860_CVGVGESDGSIWNPDGIDPK_2+_F1
1097.49	1154.6	32.4	P10860_CVGVGESDGSIWNPDGIDPK_2+_F2
1097.49	1241.6	32.4	P10860_CVGVGESDGSIWNPDGIDPK_2+_F3
731.997	855.4	32.38	P10860_CVGVGESDGSIWNPDGIDPK_3+_F1
731.997	1041.5	32.38	P10860_CVGVGESDGSIWNPDGIDPK_3+_F2
731.997	1153.5	32.38	P10860_CVGVGESDGSIWNPDGIDPK_3+_F3
1193.08	602.3	40.74	P10860_VYEGSILEADCDILIPAASEK_2+_F1
1193.08	715.4	40.74	P10860_VYEGSILEADCDILIPAASEK_2+_F2
1193.08	762.4	40.74	P10860_VYEGSILEADCDILIPAASEK_2+_F3
795.723	828.5	40.74	P10860_VYEGSILEADCDILIPAASEK_3+_F1
795.723	891.4	40.74	P10860_VYEGSILEADCDILIPAASEK_3+_F2
795.723	941.6	40.74	P10860_VYEGSILEADCDILIPAASEK_3+_F3
464.197	481.2	3.88	P04041_CEVNGEK_2+_F1
464.197	546.3	3.88	P04041_CEVNGEK_2+_F2
464.197	675.3	3.88	P04041_CEVNGEK_2+_F3
1036.22	1076.5	42.13	P04797_GILGYTEDQVVSCDFNSNSHSSTFDAGAGIALNDNFVK_4+_F1
1036.22	1090.6	42.13	P04797_GILGYTEDQVVSCDFNSNSHSSTFDAGAGIALNDNFVK_4+_F2
1036.22	1175.6	42.13	P04797_GILGYTEDQVVSCDFNSNSHSSTFDAGAGIALNDNFVK_4+_F3
824.922	641.3	31.47	P04797_VPTPNVSVVDLTCR_2+_F1
824.922	756.3	31.47	P04797_VPTPNVSVVDLTCR_2+_F2
824.922	794.4	31.47	P04797_VPTPNVSVVDLTCR_2+_F3
550.284	641.3	31.47	P04797_VPTPNVSVVDLTCR_3+_F1
550.284	756.3	31.47	P04797_VPTPNVSVVDLTCR_3+_F2
550.284	794.4	31.47	P04797_VPTPNVSVVDLTCR_3+_F3
895.443	981.5	30.37	P13444_ICDQISDAVLDAHLK_2+_F1
895.443	1068.6	30.37	P13444_ICDQISDAVLDAHLK_2+_F2
895.443	1181.7	30.37	P13444_ICDQISDAVLDAHLK_2+_F3
597.298	696.4	30.39	P13444_ICDQISDAVLDAHLK_3+_F1
597.298	795.5	30.39	P13444_ICDQISDAVLDAHLK_3+_F2
597.298	995.4	30.39	P13444_ICDQISDAVLDAHLK_3+_F3
448.225	583.3	30.37	P13444_ICDQISDAVLDAHLK_4+_F1
448.225	609.2	30.37	P13444_ICDQISDAVLDAHLK_4+_F2
448.225	696.4	30.37	P13444_ICDQISDAVLDAHLK_4+_F3
828.737	957	19.9	Q63716_HGEVCPAGWKPGSDTIKPDVNK_3+_F1
828.737	1086.4	19.9	Q63716_HGEVCPAGWKPGSDTIKPDVNK_3+_F2
828.737	1214.5	19.9	Q63716_HGEVCPAGWKPGSDTIKPDVNK_3+_F3
497.645	572.3	19.92	Q63716_HGEVCPAGWKPGSDTIKPDVNK_5+_F1
497.645	700.4	19.92	Q63716_HGEVCPAGWKPGSDTIKPDVNK_5+_F2
497.645	813.5	19.92	Q63716_HGEVCPAGWKPGSDTIKPDVNK_5+_F3
516.259	634.3	37.48	Q8VIF7_EEIVYLPCIYR_3+_F1
516.259	703.3	37.48	Q8VIF7_EEIVYLPCIYR_3+_F2
516.259	800.4	37.48	Q8VIF7_EEIVYLPCIYR_3+_F3
839.756	909.5	34.61	Q8VIF7_GGSVQVLEDQELTCQPEPLVVK_3+_F1
839.756	995.5	34.61	Q8VIF7_GGSVQVLEDQELTCQPEPLVVK_3+_F2
839.756	1142.5	34.61	Q8VIF7_GGSVQVLEDQELTCQPEPLVVK_3+_F3
560.232	709.3	11.38	P27867_HSADFCYK_2+_F1
560.232	895.4	11.38	P27867_HSADFCYK_2+_F2
560.232	982.4	11.38	P27867_HSADFCYK_2+_F3
877.174	921	33.14	Q9Z0V6_AFQFVETHGEVCPANWTPESPTIKPSPTASK_4+_F1
877.174	1005.5	33.14	Q9Z0V6_AFQFVETHGEVCPANWTPESPTIKPSPTASK_4+_F2
877.174	1245.6	33.14	Q9Z0V6_AFQFVETHGEVCPANWTPESPTIKPSPTASK_4+_F3
894.891	909.5	15.5	P28037_CPQSEEGATYEGIQK_2+_F1
894.891	966.5	15.5	P28037_CPQSEEGATYEGIQK_2+_F2
894.891	1095.5	15.5	P28037_CPQSEEGATYEGIQK_2+_F3
1001.96	723.3	31.09	P28037_ECEVLPDDTVSTLYNR_2+_F1
1001.96	1068.5	31.09	P28037_ECEVLPDDTVSTLYNR_2+_F2
1001.96	1183.6	31.09	P28037_ECEVLPDDTVSTLYNR_2+_F3
520.235	553.2	10.07	P28037_GENCIAAGR_2+_F1
520.235	739.4	10.07	P28037_GENCIAAGR_2+_F2
520.235	853.4	10.07	P28037_GENCIAAGR_2+_F3
485.737	560.3	13.31	P28037_SCALSNVK_2+_F1
485.737	631.4	13.31	P28037_SCALSNVK_2+_F2
485.737	883.4	13.31	P28037_SCALSNVK_2+_F3
799.4	927.4	37.93	P28037_SPLIIFADCDLNK_2+_F1
799.4	1074.5	37.93	P28037_SPLIIFADCDLNK_2+_F2
799.4	1187.5	37.93	P28037_SPLIIFADCDLNK_2+_F3
533.269	741.3	37.95	P28037_SPLIIFADCDLNK_3+_F1
533.269	856.4	37.95	P28037_SPLIIFADCDLNK_3+_F2
533.269	927.4	37.95	P28037_SPLIIFADCDLNK_3+_F3
972.803	1061.5	38.63	P28037_TYNTINPTDGSVICQVSLAQVSDVDK_3+_F1
972.803	1105.5	38.63	P28037_TYNTINPTDGSVICQVSLAQVSDVDK_3+_F2
972.803	1177.6	38.63	P28037_TYNTINPTDGSVICQVSLAQVSDVDK_3+_F3
1057.2	1139.6	52.56	P28037_YQALGAELNVLPFCSQFIPMEVINAPR_3+_F1
1057.2	1162.6	52.56	P28037_YQALGAELNVLPFCSQFIPMEVINAPR_3+_F2
1057.2	1172.6	52.56	P28037_YQALGAELNVLPFCSQFIPMEVINAPR_3+_F3
791.374	1109.5	51.37	P46953_VTMGGQCVALAPDDSLLVPAGFSYMWER_4+_F1
791.374	1180.5	51.37	P46953_VTMGGQCVALAPDDSLLVPAGFSYMWER_4+_F2
791.374	1243.6	51.37	P46953_VTMGGQCVALAPDDSLLVPAGFSYMWER_4+_F3
1224.55	693.3	37.68	Q66HD0_LTESPCALVASQYGWSGNMER_2+_F1
1224.55	936.4	37.68	Q66HD0_LTESPCALVASQYGWSGNMER_2+_F2
1224.55	1099.5	37.68	Q66HD0_LTESPCALVASQYGWSGNMER_2+_F3
816.704	936.4	37.66	Q66HD0_LTESPCALVASQYGWSGNMER_3+_F1
816.704	1063.5	37.66	Q66HD0_LTESPCALVASQYGWSGNMER_3+_F2
816.704	1099.5	37.66	Q66HD0_LTESPCALVASQYGWSGNMER_3+_F3
874.403	966.4	27.65	P13255_NYDYILSTGCAPPGK_2+_F1
874.403	1076.5	27.65	P13255_NYDYILSTGCAPPGK_2+_F2
874.403	1192.6	27.65	P13255_NYDYILSTGCAPPGK_2+_F3
720.378	779.4	40.6	P05178_FIDLIPTNLPHAVTCDIK_3+_F1
720.378	835.9	40.6	P05178_FIDLIPTNLPHAVTCDIK_3+_F2
720.378	950.5	40.6	P05178_FIDLIPTNLPHAVTCDIK_3+_F3
752.332	975.4	24.8	P08011_VFANPEDCAGFGK_2+_F1
752.332	1072.4	24.8	P08011_VFANPEDCAGFGK_2+_F2
752.332	1186.5	24.8	P08011_VFANPEDCAGFGK_2+_F3
535.247	575.3	16.25	P09606_CIEEAIDK_2+_F1
535.247	704.3	16.25	P09606_CIEEAIDK_2+_F2
535.247	817.4	16.25	P09606_CIEEAIDK_2+_F3
745.004	946.5	39.05	P49889_P49890_P52844_NNPCTNYSMLPETMIDLK_3+_F1
745.004	1059.6	39.05	P49889_P49890_P52844_NNPCTNYSMLPETMIDLK_3+_F2
745.004	1174.4	39.05	P49889_P49890_P52844_NNPCTNYSMLPETMIDLK_3+_F3
570.279	602.3	20.72	O88618_TCALQEGLR_2+_F1
570.279	715.4	20.72	O88618_TCALQEGLR_2+_F2
570.279	786.4	20.72	O88618_TCALQEGLR_2+_F3
442.713	481.2	8.44	P04904_CVESAVK_2+_F1
442.713	533.3	8.44	P04904_CVESAVK_2+_F2
442.713	632.4	8.44	P04904_CVESAVK_2+_F3
889.789	919.5	53.13	P14942_DGCLLFGQVPLVEIDGMLLTQTR_3+_F1
889.789	1034.5	53.13	P14942_DGCLLFGQVPLVEIDGMLLTQTR_3+_F2
889.789	1082.5	53.13	P14942_DGCLLFGQVPLVEIDGMLLTQTR_3+_F3
585.287	618.4	32.48	P04905_P08010_CLDAFPNLK_2+_F1
585.287	689.4	32.48	P04905_P08010_CLDAFPNLK_2+_F2
585.287	804.4	32.48	P04905_P08010_CLDAFPNLK_2+_F3
744.812	849.4	4.48	P04905_HHLCGETEEER_2+_F1
744.812	1101.4	4.48	P04905_HHLCGETEEER_2+_F2
744.812	1214.5	4.48	P04905_HHLCGETEEER_2+_F3
947.433	982.5	41.18	P04905_MQLIMLCYNPDFEK_2+_F1
947.433	1145.5	41.18	P04905_MQLIMLCYNPDFEK_2+_F2
947.433	1164.5	41.18	P04905_MQLIMLCYNPDFEK_2+_F3
631.958	730.4	41.18	P04905_MQLIMLCYNPDFEK_3+_F1
631.958	749.4	41.18	P04905_MQLIMLCYNPDFEK_3+_F2
631.958	912.4	41.18	P04905_MQLIMLCYNPDFEK_3+_F3
733.304	849.4	8.84	P08010_HNLCGETEEER_2+_F1
733.304	1101.4	8.84	P08010_HNLCGETEEER_2+_F2
733.304	1214.5	8.84	P08010_HNLCGETEEER_2+_F3
854.914	1010.5	32.02	P00176_P04167_P08683_IQEEAQCLVEELR_2+_F1
854.914	1138.6	32.02	P00176_P04167_P08683_IQEEAQCLVEELR_2+_F2
854.914	1209.6	32.02	P00176_P04167_P08683_IQEEAQCLVEELR_2+_F3

## Sheet: Fr4
Q1	Q3	RT	ID
1189.59	948.5	33.04	O09171_AGAAIVGVNCHFDPSTSLQTIK_2+_F1
1189.59	974.6	33.04	O09171_AGAAIVGVNCHFDPSTSLQTIK_2+_F2
1189.59	1236.6	33.04	O09171_AGAAIVGVNCHFDPSTSLQTIK_2+_F3
793.398	948.5	33.04	O09171_AGAAIVGVNCHFDPSTSLQTIK_3+_F1
793.398	974.6	33.04	O09171_AGAAIVGVNCHFDPSTSLQTIK_3+_F2
793.398	998	33.04	O09171_AGAAIVGVNCHFDPSTSLQTIK_3+_F3
605.78	797.4	14.43	O09171_VNEAACDIAR_2+_F1
605.78	868.4	14.43	O09171_VNEAACDIAR_2+_F2
605.78	997.4	14.43	O09171_VNEAACDIAR_2+_F3
853.642	880.5	48.01	P29147_METYCNSGSTDTSSVINAVTHALTAATPYTR_4+_F1
853.642	943.5	48.01	P29147_METYCNSGSTDTSSVINAVTHALTAATPYTR_4+_F2
853.642	993.5	48.01	P29147_METYCNSGSTDTSSVINAVTHALTAATPYTR_4+_F3
531.721	576.3	15.84	P51647_YCAGWADK_2+_F1
531.721	647.3	15.84	P51647_YCAGWADK_2+_F2
531.721	899.4	15.84	P51647_YCAGWADK_2+_F3
1160.88	1179.6	48.6	P15999_YTIVVSATASDAAPLQYLAPYSGCSMGEYFR_3+_F1
1160.88	1187	48.6	P15999_YTIVVSATASDAAPLQYLAPYSGCSMGEYFR_3+_F2
1160.88	1198.5	48.6	P15999_YTIVVSATASDAAPLQYLAPYSGCSMGEYFR_3+_F3
870.909	1116	48.6	P15999_YTIVVSATASDAAPLQYLAPYSGCSMGEYFR_4+_F1
870.909	1179.6	48.6	P15999_YTIVVSATASDAAPLQYLAPYSGCSMGEYFR_4+_F2
870.909	1198.5	48.6	P15999_YTIVVSATASDAAPLQYLAPYSGCSMGEYFR_4+_F3
845.02	1036.5	35.17	P18418_DMHGDSEYNIMFGPDICGPGTK_3+_F1
845.02	1049.4	35.17	P18418_DMHGDSEYNIMFGPDICGPGTK_3+_F2
845.02	1094.5	35.17	P18418_DMHGDSEYNIMFGPDICGPGTK_3+_F3
523.565	580.3	13.28	P18418_HEQNIDCGGGYVK_3+_F1
523.565	832.4	13.28	P18418_HEQNIDCGGGYVK_3+_F2
523.565	947.4	13.28	P18418_HEQNIDCGGGYVK_3+_F3
576.777	617.3	14.45	P11884_LLCGGGAAADR_2+_F1
576.777	674.3	14.45	P11884_LLCGGGAAADR_2+_F2
576.777	926.4	14.45	P11884_LLCGGGAAADR_2+_F3
384.854	432.2	14.44	P11884_LLCGGGAAADR_3+_F1
384.854	650.3	14.44	P11884_LLCGGGAAADR_3+_F2
384.854	674.3	14.44	P11884_LLCGGGAAADR_3+_F3
656.324	791.4	28.19	P10860_CAVVDVPFGGAK_2+_F1
656.324	889.5	28.19	P10860_CAVVDVPFGGAK_2+_F2
656.324	988.5	28.19	P10860_CAVVDVPFGGAK_2+_F3
437.885	479.3	28.19	P10860_CAVVDVPFGGAK_3+_F1
437.885	522.2	28.19	P10860_CAVVDVPFGGAK_3+_F2
437.885	576.3	28.19	P10860_CAVVDVPFGGAK_3+_F3
795.723	828.5	40.92	P10860_VYEGSILEADCDILIPAASEK_3+_F1
795.723	891.4	40.92	P10860_VYEGSILEADCDILIPAASEK_3+_F2
795.723	941.6	40.92	P10860_VYEGSILEADCDILIPAASEK_3+_F3
1036.22	1076.5	42.28	P04797_GILGYTEDQVVSCDFNSNSHSSTFDAGAGIALNDNFVK_4+_F1
1036.22	1090.6	42.28	P04797_GILGYTEDQVVSCDFNSNSHSSTFDAGAGIALNDNFVK_4+_F2
1036.22	1175.6	42.28	P04797_GILGYTEDQVVSCDFNSNSHSSTFDAGAGIALNDNFVK_4+_F3
824.922	855.4	31.79	P04797_VPTPNVSVVDLTCR_2+_F1
824.922	1041.5	31.79	P04797_VPTPNVSVVDLTCR_2+_F2
824.922	1140.6	31.79	P04797_VPTPNVSVVDLTCR_2+_F3
550.284	641.3	31.79	P04797_VPTPNVSVVDLTCR_3+_F1
550.284	756.3	31.79	P04797_VPTPNVSVVDLTCR_3+_F2
550.284	794.4	31.79	P04797_VPTPNVSVVDLTCR_3+_F3
794.372	896.4	47.97	P13444_TGMVLLCGEITSMAMIDYQR_3+_F1
794.372	1053.5	47.97	P13444_TGMVLLCGEITSMAMIDYQR_3+_F2
794.372	1166.6	47.97	P13444_TGMVLLCGEITSMAMIDYQR_3+_F3
621.805	700.4	20.31	Q63716_HGEVCPAGWKPGSDTIKPDVNK_4+_F1
621.805	900.4	20.31	Q63716_HGEVCPAGWKPGSDTIKPDVNK_4+_F2
621.805	1086.4	20.31	Q63716_HGEVCPAGWKPGSDTIKPDVNK_4+_F3
743.839	789.4	26.7	Q8VIF7_CGPGYATPLEAMK_2+_F1
743.839	860.5	26.7	Q8VIF7_CGPGYATPLEAMK_2+_F2
743.839	1177.6	26.7	Q8VIF7_CGPGYATPLEAMK_2+_F3
842.401	888.5	32.92	Q8VIF7_FLHDPDATQGFVGCALSSNIQR_3+_F1
842.401	1140.5	32.92	Q8VIF7_FLHDPDATQGFVGCALSSNIQR_3+_F2
842.401	1197.6	32.92	Q8VIF7_FLHDPDATQGFVGCALSSNIQR_3+_F3
632.052	704.4	32.92	Q8VIF7_FLHDPDATQGFVGCALSSNIQR_4+_F1
632.052	796.4	32.92	Q8VIF7_FLHDPDATQGFVGCALSSNIQR_4+_F2
632.052	817.5	32.92	Q8VIF7_FLHDPDATQGFVGCALSSNIQR_4+_F3
373.824	411.2	11.82	P27867_HSADFCYK_3+_F1
373.824	562.2	11.82	P27867_HSADFCYK_3+_F2
373.824	709.3	11.82	P27867_HSADFCYK_3+_F3
877.174	921	33.5	Q9Z0V6_AFQFVETHGEVCPANWTPESPTIKPSPTASK_4+_F1
877.174	1005.5	33.5	Q9Z0V6_AFQFVETHGEVCPANWTPESPTIKPSPTASK_4+_F2
877.174	1245.6	33.5	Q9Z0V6_AFQFVETHGEVCPANWTPESPTIKPSPTASK_4+_F3
1005.73	1105.5	47.95	P28037_EGATLVCGGNQVPRPGFFFQPTVFTDVEDHMYIAK_4+_F1
1005.73	1179.5	47.95	P28037_EGATLVCGGNQVPRPGFFFQPTVFTDVEDHMYIAK_4+_F2
1005.73	1220.6	47.95	P28037_EGATLVCGGNQVPRPGFFFQPTVFTDVEDHMYIAK_4+_F3
520.235	553.2	10.42	P28037_GENCIAAGR_2+_F1
520.235	739.4	10.42	P28037_GENCIAAGR_2+_F2
520.235	853.4	10.42	P28037_GENCIAAGR_2+_F3
485.737	560.3	13.72	P28037_SCALSNVK_2+_F1
485.737	631.4	13.72	P28037_SCALSNVK_2+_F2
485.737	883.4	13.72	P28037_SCALSNVK_2+_F3
799.4	927.4	38.23	P28037_SPLIIFADCDLNK_2+_F1
799.4	1074.5	38.23	P28037_SPLIIFADCDLNK_2+_F2
799.4	1187.5	38.23	P28037_SPLIIFADCDLNK_2+_F3
569.737	757.3	24.25	P28037_YFAGWCDK_2+_F1
569.737	828.3	24.25	P28037_YFAGWCDK_2+_F2
569.737	975.4	24.25	P28037_YFAGWCDK_2+_F3
753.347	935.4	36.34	P11598_FIQESIFGLCPHMTEDNK_3+_F1
753.347	971.4	36.34	P11598_FIQESIFGLCPHMTEDNK_3+_F2
753.347	999.4	36.34	P11598_FIQESIFGLCPHMTEDNK_3+_F3
1059.2	1086.6	54.4	Q64591_LGTVEELANLATFLCSDYASWINGAVIR_3+_F1
1059.2	1111.6	54.4	Q64591_LGTVEELANLATFLCSDYASWINGAVIR_3+_F2
1059.2	1125.1	54.4	Q64591_LGTVEELANLATFLCSDYASWINGAVIR_3+_F3
1054.83	1109.5	51.46	P46953_VTMGGQCVALAPDDSLLVPAGFSYMWER_3+_F1
1054.83	1180.5	51.46	P46953_VTMGGQCVALAPDDSLLVPAGFSYMWER_3+_F2
1054.83	1243.6	51.46	P46953_VTMGGQCVALAPDDSLLVPAGFSYMWER_3+_F3
816.704	936.4	37.91	Q66HD0_LTESPCALVASQYGWSGNMER_3+_F1
816.704	1063.5	37.91	Q66HD0_LTESPCALVASQYGWSGNMER_3+_F2
816.704	1099.5	37.91	Q66HD0_LTESPCALVASQYGWSGNMER_3+_F3
569.8	660.4	31.79	P30904_LLCGLLSDR_2+_F1
569.8	762.4	31.79	P30904_LLCGLLSDR_2+_F2
569.8	912.4	31.79	P30904_LLCGLLSDR_2+_F3
583.271	778.5	27.98	P13255_NYDYILSTGCAPPGK_3+_F1
583.271	879.4	27.98	P13255_NYDYILSTGCAPPGK_3+_F2
583.271	966.4	27.98	P13255_NYDYILSTGCAPPGK_3+_F3
432.723	478.2	13.8	Q03248_CPQIVR_2+_F1
432.723	515.3	13.8	Q03248_CPQIVR_2+_F2
432.723	612.4	13.8	Q03248_CPQIVR_2+_F3
706.337	827.4	22.91	P48500_AIADNVKDWCK_2+_F1
706.337	927.4	22.91	P48500_AIADNVKDWCK_2+_F2
706.337	1041.5	22.91	P48500_AIADNVKDWCK_2+_F3
678.347	955.5	24.09	D4A631_IVSTSLDCLQK_2+_F1
678.347	1081.5	24.09	D4A631_IVSTSLDCLQK_2+_F2
678.347	1209.6	24.09	D4A631_IVSTSLDCLQK_2+_F3
690.707	837.4	36.45	Q03346_IVLAAAGGVCHNELLELAK_3+_F1
690.707	872.9	36.45	Q03346_IVLAAAGGVCHNELLELAK_3+_F2
690.707	929.5	36.45	Q03346_IVLAAAGGVCHNELLELAK_3+_F3
631.958	730.4	41.42	P04905_MQLIMLCYNPDFEK_3+_F1
631.958	749.4	41.42	P04905_MQLIMLCYNPDFEK_3+_F2
631.958	912.4	41.42	P04905_MQLIMLCYNPDFEK_3+_F3
947.433	982.5	41.4	P04905_MQLIMLCYNPDFEK_2+_F1
947.433	1145.5	41.4	P04905_MQLIMLCYNPDFEK_2+_F2
947.433	1164.5	41.4	P04905_MQLIMLCYNPDFEK_2+_F3
629.81	705.4	23.81	P04906_STCLYGQLPK_2+_F1
629.81	818.5	23.81	P04906_STCLYGQLPK_2+_F2
629.81	1070.5	23.81	P04906_STCLYGQLPK_2+_F3

## Sheet: Fr5
Q1	Q3	RT	ID
793.398	948.5	33.12	O09171_AGAAIVGVNCHFDPSTSLQTIK_3+_F1
793.398	974.6	33.12	O09171_AGAAIVGVNCHFDPSTSLQTIK_3+_F2
793.398	998	33.12	O09171_AGAAIVGVNCHFDPSTSLQTIK_3+_F3
595.301	602.4	33.08	O09171_AGAAIVGVNCHFDPSTSLQTIK_4+_F1
595.301	689.4	33.08	O09171_AGAAIVGVNCHFDPSTSLQTIK_4+_F2
595.301	790.5	33.08	O09171_AGAAIVGVNCHFDPSTSLQTIK_4+_F3
605.78	797.4	14.5	O09171_VNEAACDIAR_2+_F1
605.78	868.4	14.5	O09171_VNEAACDIAR_2+_F2
605.78	997.4	14.5	O09171_VNEAACDIAR_2+_F3
578.266	588.3	30.55	P36365_SCDLGGLWR_2+_F1
578.266	701.4	30.55	P36365_SCDLGGLWR_2+_F2
578.266	816.4	30.55	P36365_SCDLGGLWR_2+_F3
910.948	995.5	37.23	P29147_AVLVTGCDSGFGFSLAK_2+_F1
910.948	1028.5	37.23	P29147_AVLVTGCDSGFGFSLAK_2+_F2
910.948	1199.5	37.23	P29147_AVLVTGCDSGFGFSLAK_2+_F3
1137.85	880.5	48.1	P29147_METYCNSGSTDTSSVINAVTHALTAATPYTR_3+_F1
1137.85	1201.6	48.1	P29147_METYCNSGSTDTSSVINAVTHALTAATPYTR_3+_F2
1137.85	1217.6	48.1	P29147_METYCNSGSTDTSSVINAVTHALTAATPYTR_3+_F3
853.642	880.5	48.08	P29147_METYCNSGSTDTSSVINAVTHALTAATPYTR_4+_F1
853.642	943.5	48.08	P29147_METYCNSGSTDTSSVINAVTHALTAATPYTR_4+_F2
853.642	993.5	48.08	P29147_METYCNSGSTDTSSVINAVTHALTAATPYTR_4+_F3
420.687	495.2	4.86	P51647_LECGGGR_2+_F1
420.687	598.2	4.86	P51647_LECGGGR_2+_F2
420.687	727.3	4.86	P51647_LECGGGR_2+_F3
531.721	576.3	15.94	P51647_YCAGWADK_2+_F1
531.721	647.3	15.94	P51647_YCAGWADK_2+_F2
531.721	899.4	15.94	P51647_YCAGWADK_2+_F3
1160.88	1179.6	48.63	P15999_YTIVVSATASDAAPLQYLAPYSGCSMGEYFR_3+_F1
1160.88	1187	48.63	P15999_YTIVVSATASDAAPLQYLAPYSGCSMGEYFR_3+_F2
1160.88	1198.5	48.63	P15999_YTIVVSATASDAAPLQYLAPYSGCSMGEYFR_3+_F3
870.909	1116	48.65	P15999_YTIVVSATASDAAPLQYLAPYSGCSMGEYFR_4+_F1
870.909	1179.6	48.65	P15999_YTIVVSATASDAAPLQYLAPYSGCSMGEYFR_4+_F2
870.909	1198.5	48.65	P15999_YTIVVSATASDAAPLQYLAPYSGCSMGEYFR_4+_F3
938.142	956.5	52.47	P11884_HEPVGVCGQIIPWNFPLLMQAWK_3+_F1
938.142	1056.5	52.47	P11884_HEPVGVCGQIIPWNFPLLMQAWK_3+_F2
938.142	1133.6	52.47	P11884_HEPVGVCGQIIPWNFPLLMQAWK_3+_F3
576.777	617.3	14.51	P11884_LLCGGGAAADR_2+_F1
576.777	674.3	14.51	P11884_LLCGGGAAADR_2+_F2
576.777	926.4	14.51	P11884_LLCGGGAAADR_2+_F3
656.324	791.4	28.32	P10860_CAVVDVPFGGAK_2+_F1
656.324	889.5	28.32	P10860_CAVVDVPFGGAK_2+_F2
656.324	988.5	28.32	P10860_CAVVDVPFGGAK_2+_F3
824.922	855.4	31.91	P04797_VPTPNVSVVDLTCR_2+_F1
824.922	1041.5	31.91	P04797_VPTPNVSVVDLTCR_2+_F2
824.922	1140.6	31.91	P04797_VPTPNVSVVDLTCR_2+_F3
550.284	641.3	31.89	P04797_VPTPNVSVVDLTCR_3+_F1
550.284	756.3	31.89	P04797_VPTPNVSVVDLTCR_3+_F2
550.284	794.4	31.89	P04797_VPTPNVSVVDLTCR_3+_F3
794.372	896.4	48	P13444_TGMVLLCGEITSMAMIDYQR_3+_F1
794.372	1053.5	48	P13444_TGMVLLCGEITSMAMIDYQR_3+_F2
794.372	1166.6	48	P13444_TGMVLLCGEITSMAMIDYQR_3+_F3
621.805	700.4	20.43	Q63716_HGEVCPAGWKPGSDTIKPDVNK_4+_F1
621.805	900.4	20.43	Q63716_HGEVCPAGWKPGSDTIKPDVNK_4+_F2
621.805	1086.4	20.43	Q63716_HGEVCPAGWKPGSDTIKPDVNK_4+_F3
743.839	789.4	26.8	Q8VIF7_CGPGYATPLEAMK_2+_F1
743.839	860.5	26.8	Q8VIF7_CGPGYATPLEAMK_2+_F2
743.839	1177.6	26.8	Q8VIF7_CGPGYATPLEAMK_2+_F3
842.401	888.5	32.98	Q8VIF7_FLHDPDATQGFVGCALSSNIQR_3+_F1
842.401	1140.5	32.98	Q8VIF7_FLHDPDATQGFVGCALSSNIQR_3+_F2
842.401	1197.6	32.98	Q8VIF7_FLHDPDATQGFVGCALSSNIQR_3+_F3
632.052	704.4	32.98	Q8VIF7_FLHDPDATQGFVGCALSSNIQR_4+_F1
632.052	796.4	32.98	Q8VIF7_FLHDPDATQGFVGCALSSNIQR_4+_F2
632.052	817.5	32.98	Q8VIF7_FLHDPDATQGFVGCALSSNIQR_4+_F3
877.174	921	33.59	Q9Z0V6_AFQFVETHGEVCPANWTPESPTIKPSPTASK_4+_F1
877.174	1005.5	33.59	Q9Z0V6_AFQFVETHGEVCPANWTPESPTIKPSPTASK_4+_F2
877.174	1245.6	33.59	Q9Z0V6_AFQFVETHGEVCPANWTPESPTIKPSPTASK_4+_F3
1005.73	1105.5	48.02	P28037_EGATLVCGGNQVPRPGFFFQPTVFTDVEDHMYIAK_4+_F1
1005.73	1179.5	48.02	P28037_EGATLVCGGNQVPRPGFFFQPTVFTDVEDHMYIAK_4+_F2
1005.73	1220.6	48.02	P28037_EGATLVCGGNQVPRPGFFFQPTVFTDVEDHMYIAK_4+_F3
520.235	553.2	10.49	P28037_GENCIAAGR_2+_F1
520.235	739.4	10.49	P28037_GENCIAAGR_2+_F2
520.235	853.4	10.49	P28037_GENCIAAGR_2+_F3
530.25	718.3	13.64	P28037_LVEYCQR_2+_F1
530.25	847.3	13.64	P28037_LVEYCQR_2+_F2
530.25	946.4	13.64	P28037_LVEYCQR_2+_F3
485.737	560.3	13.8	P28037_SCALSNVK_2+_F1
485.737	631.4	13.8	P28037_SCALSNVK_2+_F2
485.737	883.4	13.8	P28037_SCALSNVK_2+_F3
799.4	927.4	38.33	P28037_SPLIIFADCDLNK_2+_F1
799.4	1074.5	38.33	P28037_SPLIIFADCDLNK_2+_F2
799.4	1187.5	38.33	P28037_SPLIIFADCDLNK_2+_F3
569.737	757.3	24.37	P28037_YFAGWCDK_2+_F1
569.737	828.3	24.37	P28037_YFAGWCDK_2+_F2
569.737	975.4	24.37	P28037_YFAGWCDK_2+_F3
1057.2	1139.6	52.58	P28037_YQALGAELNVLPFCSQFIPMEVINAPR_3+_F1
1057.2	1162.6	52.58	P28037_YQALGAELNVLPFCSQFIPMEVINAPR_3+_F2
1057.2	1172.6	52.58	P28037_YQALGAELNVLPFCSQFIPMEVINAPR_3+_F3
753.347	935.4	36.47	P11598_FIQESIFGLCPHMTEDNK_3+_F1
753.347	971.4	36.47	P11598_FIQESIFGLCPHMTEDNK_3+_F2
753.347	999.4	36.47	P11598_FIQESIFGLCPHMTEDNK_3+_F3
1059.2	1086.6	54.38	Q64591_LGTVEELANLATFLCSDYASWINGAVIR_3+_F1
1059.2	1111.6	54.38	Q64591_LGTVEELANLATFLCSDYASWINGAVIR_3+_F2
1059.2	1125.1	54.38	Q64591_LGTVEELANLATFLCSDYASWINGAVIR_3+_F3
620.295	709.3	19.21	P46953_ASFQPPVCNK_2+_F1
620.295	806.4	19.21	P46953_ASFQPPVCNK_2+_F2
620.295	934.4	19.21	P46953_ASFQPPVCNK_2+_F3
569.8	660.4	31.91	P30904_LLCGLLSDR_2+_F1
569.8	762.4	31.91	P30904_LLCGLLSDR_2+_F2
569.8	912.4	31.91	P30904_LLCGLLSDR_2+_F3
879.753	887.9	52.45	P13255_LSYYPHCLASFTELVQEAFGGR_3+_F1
879.753	976.5	52.45	P13255_LSYYPHCLASFTELVQEAFGGR_3+_F2
879.753	1101.5	52.45	P13255_LSYYPHCLASFTELVQEAFGGR_3+_F3
823.9	869.4	38.81	P48500_CLGELICTLNAAK_2+_F1
823.9	982.5	38.81	P48500_CLGELICTLNAAK_2+_F2
823.9	1095.6	38.81	P48500_CLGELICTLNAAK_2+_F3
432.723	478.2	13.94	Q03248_CPQIVR_2+_F1
432.723	515.3	13.94	Q03248_CPQIVR_2+_F2
432.723	612.4	13.94	Q03248_CPQIVR_2+_F3
626.313	617.3	49.83	Q5XI58_IHCNDFLIK_2+_F1
626.313	635.4	49.83	Q5XI58_IHCNDFLIK_2+_F2
626.313	992.4	49.83	Q5XI58_IHCNDFLIK_2+_F3
585.287	618.4	29.35	P04905_P08010_CLDAFPNLK_2+_F1
585.287	689.4	29.35	P04905_P08010_CLDAFPNLK_2+_F2
585.287	804.4	29.35	P04905_P08010_CLDAFPNLK_2+_F3
631.958	730.4	41.5	P04905_MQLIMLCYNPDFEK_3+_F1
631.958	749.4	41.5	P04905_MQLIMLCYNPDFEK_3+_F2
631.958	912.4	41.5	P04905_MQLIMLCYNPDFEK_3+_F3
947.433	982.5	41.5	P04905_MQLIMLCYNPDFEK_2+_F1
947.433	1145.5	41.5	P04905_MQLIMLCYNPDFEK_2+_F2
947.433	1164.5	41.5	P04905_MQLIMLCYNPDFEK_2+_F3
629.81	705.4	23.92	P04906_STCLYGQLPK_2+_F1
629.81	818.5	23.92	P04906_STCLYGQLPK_2+_F2
629.81	1070.5	23.92	P04906_STCLYGQLPK_2+_F3

## Sheet: Fr6
Q1	Q3	RT	ID
793.398	948.5	33.18	O09171_AGAAIVGVNCHFDPSTSLQTIK_3+_F1
793.398	974.6	33.18	O09171_AGAAIVGVNCHFDPSTSLQTIK_3+_F2
793.398	998	33.18	O09171_AGAAIVGVNCHFDPSTSLQTIK_3+_F3
595.301	602.4	33.2	O09171_AGAAIVGVNCHFDPSTSLQTIK_4+_F1
595.301	689.4	33.2	O09171_AGAAIVGVNCHFDPSTSLQTIK_4+_F2
595.301	790.5	33.2	O09171_AGAAIVGVNCHFDPSTSLQTIK_4+_F3
400.205	448.3	8.95	P36365_VCSITK_2+_F1
400.205	552.2	8.95	P36365_VCSITK_2+_F2
400.205	700.3	8.95	P36365_VCSITK_2+_F3
656.324	791.4	28.36	P10860_CAVVDVPFGGAK_2+_F1
656.324	889.5	28.36	P10860_CAVVDVPFGGAK_2+_F2
656.324	988.5	28.36	P10860_CAVVDVPFGGAK_2+_F3
824.922	641.3	31.98	P04797_VPTPNVSVVDLTCR_2+_F1
824.922	756.3	31.98	P04797_VPTPNVSVVDLTCR_2+_F2
824.922	794.4	31.98	P04797_VPTPNVSVVDLTCR_2+_F3
550.284	641.3	31.98	P04797_VPTPNVSVVDLTCR_3+_F1
550.284	756.3	31.98	P04797_VPTPNVSVVDLTCR_3+_F2
550.284	794.4	31.98	P04797_VPTPNVSVVDLTCR_3+_F3
597.298	696.4	30.91	P13444_ICDQISDAVLDAHLK_3+_F1
597.298	795.5	30.91	P13444_ICDQISDAVLDAHLK_3+_F2
597.298	995.4	30.91	P13444_ICDQISDAVLDAHLK_3+_F3
621.805	700.4	20.5	Q63716_HGEVCPAGWKPGSDTIKPDVNK_4+_F1
621.805	900.4	20.5	Q63716_HGEVCPAGWKPGSDTIKPDVNK_4+_F2
621.805	1086.4	20.5	Q63716_HGEVCPAGWKPGSDTIKPDVNK_4+_F3
842.401	888.5	33.09	Q8VIF7_FLHDPDATQGFVGCALSSNIQR_3+_F1
842.401	1140.5	33.09	Q8VIF7_FLHDPDATQGFVGCALSSNIQR_3+_F2
842.401	1197.6	33.09	Q8VIF7_FLHDPDATQGFVGCALSSNIQR_3+_F3
560.232	709.3	11.92	P27867_HSADFCYK_2+_F1
560.232	895.4	11.92	P27867_HSADFCYK_2+_F2
560.232	982.4	11.92	P27867_HSADFCYK_2+_F3
877.174	921	33.71	Q9Z0V6_AFQFVETHGEVCPANWTPESPTIKPSPTASK_4+_F1
877.174	1005.5	33.71	Q9Z0V6_AFQFVETHGEVCPANWTPESPTIKPSPTASK_4+_F2
877.174	1245.6	33.71	Q9Z0V6_AFQFVETHGEVCPANWTPESPTIKPSPTASK_4+_F3
485.737	560.3	13.8	P28037_SCALSNVK_2+_F1
485.737	631.4	13.8	P28037_SCALSNVK_2+_F2
485.737	883.4	13.8	P28037_SCALSNVK_2+_F3
867.488	961.1	36.09	P28037_TAACLAAGNTVVIKPAQVTPLTALK_3+_F1
867.488	996.6	36.09	P28037_TAACLAAGNTVVIKPAQVTPLTALK_3+_F2
867.488	1138.7	36.09	P28037_TAACLAAGNTVVIKPAQVTPLTALK_3+_F3
569.737	757.3	24.42	P28037_YFAGWCDK_2+_F1
569.737	828.3	24.42	P28037_YFAGWCDK_2+_F2
569.737	975.4	24.42	P28037_YFAGWCDK_2+_F3
620.295	709.3	19.23	P46953_ASFQPPVCNK_2+_F1
620.295	806.4	19.23	P46953_ASFQPPVCNK_2+_F2
620.295	934.4	19.23	P46953_ASFQPPVCNK_2+_F3
413.866	513.2	19.23	P46953_ASFQPPVCNK_3+_F1
413.866	709.3	19.23	P46953_ASFQPPVCNK_3+_F2
413.866	806.4	19.23	P46953_ASFQPPVCNK_3+_F3
569.8	660.4	31.98	P30904_LLCGLLSDR_2+_F1
569.8	762.4	31.98	P30904_LLCGLLSDR_2+_F2
569.8	912.4	31.98	P30904_LLCGLLSDR_2+_F3
709.84	789.4	17.73	P16638_YICTTSAIQNR_2+_F1
709.84	890.5	17.73	P16638_YICTTSAIQNR_2+_F2
709.84	1142.5	17.73	P16638_YICTTSAIQNR_2+_F3
432.723	478.2	13.75	Q03248_CPQIVR_2+_F1
432.723	515.3	13.75	Q03248_CPQIVR_2+_F2
432.723	612.4	13.75	Q03248_CPQIVR_2+_F3
601.979	748.3	35.38	P57113_ALLALEAFQVSHPCR_3+_F1
601.979	847.4	35.38	P57113_ALLALEAFQVSHPCR_3+_F2
601.979	975.4	35.38	P57113_ALLALEAFQVSHPCR_3+_F3
947.433	982.5	41.59	P04905_MQLIMLCYNPDFEK_2+_F1
947.433	1145.5	41.59	P04905_MQLIMLCYNPDFEK_2+_F2
947.433	1164.5	41.59	P04905_MQLIMLCYNPDFEK_2+_F3
631.958	730.4	41.57	P04905_MQLIMLCYNPDFEK_3+_F1
631.958	749.4	41.57	P04905_MQLIMLCYNPDFEK_3+_F2
631.958	912.4	41.57	P04905_MQLIMLCYNPDFEK_3+_F3

## Sheet: Fr7
Q1	Q3	RT	ID
1189.59	948.5	32.83	O09171_AGAAIVGVNCHFDPSTSLQTIK_2+_F1
1189.59	974.6	32.83	O09171_AGAAIVGVNCHFDPSTSLQTIK_2+_F2
1189.59	1236.6	32.83	O09171_AGAAIVGVNCHFDPSTSLQTIK_2+_F3
793.398	948.5	32.84	O09171_AGAAIVGVNCHFDPSTSLQTIK_3+_F1
793.398	974.6	32.84	O09171_AGAAIVGVNCHFDPSTSLQTIK_3+_F2
793.398	998	32.84	O09171_AGAAIVGVNCHFDPSTSLQTIK_3+_F3
519.242	529.2	20.7	P36365_CIYFNTK_2+_F1
519.242	672.3	20.7	P36365_CIYFNTK_2+_F2
519.242	785.4	20.7	P36365_CIYFNTK_2+_F3
607.634	769.4	36.99	P29147_AVLVTGCDSGFGFSLAK_3+_F1
607.634	826.4	36.99	P29147_AVLVTGCDSGFGFSLAK_3+_F2
607.634	913.4	36.99	P29147_AVLVTGCDSGFGFSLAK_3+_F3
696.816	889.4	33.94	P29147_FGVEAFSDCLR_2+_F1
696.816	960.4	33.94	P29147_FGVEAFSDCLR_2+_F2
696.816	1089.5	33.94	P29147_FGVEAFSDCLR_2+_F3
658.857	753.4	44.84	P29147_GFLVFAGCLLK_2+_F1
658.857	900.5	44.84	P29147_GFLVFAGCLLK_2+_F2
658.857	999.5	44.84	P29147_GFLVFAGCLLK_2+_F3
1137.85	880.5	47.8	P29147_METYCNSGSTDTSSVINAVTHALTAATPYTR_3+_F1
1137.85	1201.6	47.8	P29147_METYCNSGSTDTSSVINAVTHALTAATPYTR_3+_F2
1137.85	1217.6	47.8	P29147_METYCNSGSTDTSSVINAVTHALTAATPYTR_3+_F3
853.642	880.5	47.78	P29147_METYCNSGSTDTSSVINAVTHALTAATPYTR_4+_F1
853.642	943.5	47.78	P29147_METYCNSGSTDTSSVINAVTHALTAATPYTR_4+_F2
853.642	993.5	47.78	P29147_METYCNSGSTDTSSVINAVTHALTAATPYTR_4+_F3
917.479	1046.5	54.75	P51647_EPIGVCGQIIPWNFPLLMFIWK_3+_F1
917.479	1047.6	54.75	P51647_EPIGVCGQIIPWNFPLLMFIWK_3+_F2
917.479	1159.6	54.75	P51647_EPIGVCGQIIPWNFPLLMFIWK_3+_F3
1160.88	1179.6	48.46	P15999_YTIVVSATASDAAPLQYLAPYSGCSMGEYFR_3+_F1
1160.88	1187	48.46	P15999_YTIVVSATASDAAPLQYLAPYSGCSMGEYFR_3+_F2
1160.88	1198.5	48.46	P15999_YTIVVSATASDAAPLQYLAPYSGCSMGEYFR_3+_F3
870.909	1116	48.46	P15999_YTIVVSATASDAAPLQYLAPYSGCSMGEYFR_4+_F1
870.909	1179.6	48.46	P15999_YTIVVSATASDAAPLQYLAPYSGCSMGEYFR_4+_F2
870.909	1198.5	48.46	P15999_YTIVVSATASDAAPLQYLAPYSGCSMGEYFR_4+_F3
703.858	765.9	52.41	P11884_HEPVGVCGQIIPWNFPLLMQAWK_4+_F1
703.858	822.4	52.41	P11884_HEPVGVCGQIIPWNFPLLMQAWK_4+_F2
703.858	986.5	52.41	P11884_HEPVGVCGQIIPWNFPLLMQAWK_4+_F3
576.777	617.3	14.34	P11884_LLCGGGAAADR_2+_F1
576.777	674.3	14.34	P11884_LLCGGGAAADR_2+_F2
576.777	926.4	14.34	P11884_LLCGGGAAADR_2+_F3
656.324	791.4	27.97	P10860_CAVVDVPFGGAK_2+_F1
656.324	889.5	27.97	P10860_CAVVDVPFGGAK_2+_F2
656.324	988.5	27.97	P10860_CAVVDVPFGGAK_2+_F3
1027.24	1149.6	36.79	P10860_EMSWIADTYASTIGHYDINAHACVTGKPISQGGIHGR_4+_F1
1027.24	1206.7	36.79	P10860_EMSWIADTYASTIGHYDINAHACVTGKPISQGGIHGR_4+_F2
1027.24	1222.1	36.79	P10860_EMSWIADTYASTIGHYDINAHACVTGKPISQGGIHGR_4+_F3
685.161	811.4	36.79	P10860_EMSWIADTYASTIGHYDINAHACVTGKPISQGGIHGR_6+_F1
685.161	865.4	36.79	P10860_EMSWIADTYASTIGHYDINAHACVTGKPISQGGIHGR_6+_F2
685.161	1021.6	36.79	P10860_EMSWIADTYASTIGHYDINAHACVTGKPISQGGIHGR_6+_F3
587.425	811.4	36.75	P10860_EMSWIADTYASTIGHYDINAHACVTGKPISQGGIHGR_7+_F1
587.425	865.4	36.75	P10860_EMSWIADTYASTIGHYDINAHACVTGKPISQGGIHGR_7+_F2
587.425	1021.6	36.75	P10860_EMSWIADTYASTIGHYDINAHACVTGKPISQGGIHGR_7+_F3
731.69	856.4	34.7	P04041_GLVVLGFPCNQFGHQENGK_3+_F1
731.69	912.9	34.7	P04041_GLVVLGFPCNQFGHQENGK_3+_F2
731.69	962.4	34.7	P04041_GLVVLGFPCNQFGHQENGK_3+_F3
643.324	710.3	33.33	P04041_YIIWSPVCR_2+_F1
643.324	896.4	33.33	P04041_YIIWSPVCR_2+_F2
643.324	1009.5	33.33	P04041_YIIWSPVCR_2+_F3
794.372	896.4	47.61	P13444_TGMVLLCGEITSMAMIDYQR_3+_F1
794.372	1053.5	47.61	P13444_TGMVLLCGEITSMAMIDYQR_3+_F2
794.372	1166.6	47.61	P13444_TGMVLLCGEITSMAMIDYQR_3+_F3
1062.52	1110.5	54.65	Q63716_YVVFFFYPLDFTFVCPTEIIAFSDR_3+_F1
1062.52	1148.6	54.65	Q63716_YVVFFFYPLDFTFVCPTEIIAFSDR_3+_F2
1062.52	1239.6	54.65	Q63716_YVVFFFYPLDFTFVCPTEIIAFSDR_3+_F3
842.401	888.5	32.74	Q8VIF7_FLHDPDATQGFVGCALSSNIQR_3+_F1
842.401	1140.5	32.74	Q8VIF7_FLHDPDATQGFVGCALSSNIQR_3+_F2
842.401	1197.6	32.74	Q8VIF7_FLHDPDATQGFVGCALSSNIQR_3+_F3
925.917	631.2	40.04	P27867_YCNTWPMAVSMLASK_2+_F1
925.917	817.3	40.04	P27867_YCNTWPMAVSMLASK_2+_F2
925.917	1034.5	40.04	P27867_YCNTWPMAVSMLASK_2+_F3
617.614	735.4	40.08	P27867_YCNTWPMAVSMLASK_3+_F1
617.614	806.4	40.08	P27867_YCNTWPMAVSMLASK_3+_F2
617.614	1034.5	40.08	P27867_YCNTWPMAVSMLASK_3+_F3
624.706	743.5	52.39	P27867_VLVCGAGPIGIVTLLVAK_3+_F1
624.706	913.6	52.39	P27867_VLVCGAGPIGIVTLLVAK_3+_F2
624.706	1016.5	52.39	P27867_VLVCGAGPIGIVTLLVAK_3+_F3
560.232	709.3	11.6	P27867_HSADFCYK_2+_F1
560.232	895.4	11.6	P27867_HSADFCYK_2+_F2
560.232	982.4	11.6	P27867_HSADFCYK_2+_F3
740.323	847.4	21.66	P27867_MHSVGICGSDVHYWEHGR_3+_F1
740.323	975.9	21.66	P27867_MHSVGICGSDVHYWEHGR_3+_F2
740.323	1083.5	21.66	P27867_MHSVGICGSDVHYWEHGR_3+_F3
877.174	921	33.31	Q9Z0V6_AFQFVETHGEVCPANWTPESPTIKPSPTASK_4+_F1
877.174	1005.5	33.31	Q9Z0V6_AFQFVETHGEVCPANWTPESPTIKPSPTASK_4+_F2
877.174	1245.6	33.31	Q9Z0V6_AFQFVETHGEVCPANWTPESPTIKPSPTASK_4+_F3
709.337	786.4	40.54	Q9Z0V6_ANEFHDVNCEVVAVSVDSHFSHLAWINTPR_5+_F1
709.337	857.5	40.54	Q9Z0V6_ANEFHDVNCEVVAVSVDSHFSHLAWINTPR_5+_F2
709.337	934	40.54	Q9Z0V6_ANEFHDVNCEVVAVSVDSHFSHLAWINTPR_5+_F3
1041.85	1089.5	54.53	Q9Z0V6_YLVLFFYPLDFTFVCPTEIVAFSDK_3+_F1
1041.85	1106.6	54.53	Q9Z0V6_YLVLFFYPLDFTFVCPTEIVAFSDK_3+_F2
1041.85	1358.6	54.53	Q9Z0V6_YLVLFFYPLDFTFVCPTEIVAFSDK_3+_F3
860.745	997.4	22.36	P09118_HVHAFIHTPTGTHFCDVEQVR_3+_F1
860.745	1068.5	22.36	P09118_HVHAFIHTPTGTHFCDVEQVR_3+_F2
860.745	1172.6	22.36	P09118_HVHAFIHTPTGTHFCDVEQVR_3+_F3
645.811	819.4	22.36	P09118_HVHAFIHTPTGTHFCDVEQVR_4+_F1
645.811	997.4	22.36	P09118_HVHAFIHTPTGTHFCDVEQVR_4+_F2
645.811	1144.5	22.36	P09118_HVHAFIHTPTGTHFCDVEQVR_4+_F3
516.85	592.3	22.36	P09118_HVHAFIHTPTGTHFCDVEQVR_5+_F1
516.85	705.4	22.36	P09118_HVHAFIHTPTGTHFCDVEQVR_5+_F2
516.85	997.4	22.36	P09118_HVHAFIHTPTGTHFCDVEQVR_5+_F3
902.421	920.5	52.68	P09118_SIETFAMNICEHFLSSFSHVTR_3+_F1
902.421	963.5	52.68	P09118_SIETFAMNICEHFLSSFSHVTR_3+_F2
902.421	1033.5	52.68	P09118_SIETFAMNICEHFLSSFSHVTR_3+_F3
677.068	849.9	52.69	P09118_SIETFAMNICEHFLSSFSHVTR_4+_F1
677.068	920.5	52.69	P09118_SIETFAMNICEHFLSSFSHVTR_4+_F2
677.068	1180.6	52.69	P09118_SIETFAMNICEHFLSSFSHVTR_4+_F3
1005.73	1105.5	47.7	P28037_EGATLVCGGNQVPRPGFFFQPTVFTDVEDHMYIAK_4+_F1
1005.73	1179.5	47.7	P28037_EGATLVCGGNQVPRPGFFFQPTVFTDVEDHMYIAK_4+_F2
1005.73	1220.6	47.7	P28037_EGATLVCGGNQVPRPGFFFQPTVFTDVEDHMYIAK_4+_F3
894.449	1005.5	53.62	P28037_EPVGVCGIVIPWNYPLMMLSWK_3+_F1
894.449	1168.6	53.62	P28037_EPVGVCGIVIPWNYPLMMLSWK_3+_F2
894.449	1282.6	53.62	P28037_EPVGVCGIVIPWNYPLMMLSWK_3+_F3
530.25	718.3	13.41	P28037_LVEYCQR_2+_F1
530.25	847.3	13.41	P28037_LVEYCQR_2+_F2
530.25	946.4	13.41	P28037_LVEYCQR_2+_F3
867.488	961.1	35.7	P28037_TAACLAAGNTVVIKPAQVTPLTALK_3+_F1
867.488	996.6	35.7	P28037_TAACLAAGNTVVIKPAQVTPLTALK_3+_F2
867.488	1138.7	35.7	P28037_TAACLAAGNTVVIKPAQVTPLTALK_3+_F3
804.885	1016.4	21.91	P04785_ITQFCHHFLEGK_2+_F1
804.885	1119.5	21.91	P04785_ITQFCHHFLEGK_2+_F2
804.885	1163.5	21.91	P04785_ITQFCHHFLEGK_2+_F3
669.001	797.4	41.77	Q64591_AMTTFLSSLGAQCVIASR_3+_F1
669.001	925.5	41.77	Q64591_AMTTFLSSLGAQCVIASR_3+_F2
669.001	1053.5	41.77	Q64591_AMTTFLSSLGAQCVIASR_3+_F3
1059.2	1086.6	54.39	Q64591_LGTVEELANLATFLCSDYASWINGAVIR_3+_F1
1059.2	1111.6	54.39	Q64591_LGTVEELANLATFLCSDYASWINGAVIR_3+_F2
1059.2	1125.1	54.39	Q64591_LGTVEELANLATFLCSDYASWINGAVIR_3+_F3
794.65	928.5	54.38	Q64591_LGTVEELANLATFLCSDYASWINGAVIR_4+_F1
794.65	1015.6	54.38	Q64591_LGTVEELANLATFLCSDYASWINGAVIR_4+_F2
794.65	1040.6	54.38	Q64591_LGTVEELANLATFLCSDYASWINGAVIR_4+_F3
620.295	709.3	18.93	P46953_ASFQPPVCNK_2+_F1
620.295	806.4	18.93	P46953_ASFQPPVCNK_2+_F2
620.295	934.4	18.93	P46953_ASFQPPVCNK_2+_F3
569.8	660.4	31.53	P30904_LLCGLLSDR_2+_F1
569.8	762.4	31.53	P30904_LLCGLLSDR_2+_F2
569.8	912.4	31.53	P30904_LLCGLLSDR_2+_F3
380.202	490.3	31.5	P30904_LLCGLLSDR_3+_F1
380.202	536.3	31.5	P30904_LLCGLLSDR_3+_F2
380.202	660.4	31.5	P30904_LLCGLLSDR_3+_F3
598.637	700.4	34.55	P21775_P07871_QCSSGLQAVANIAGGIR_3+_F1
598.637	771.4	34.55	P21775_P07871_QCSSGLQAVANIAGGIR_3+_F2
598.637	924.4	34.55	P21775_P07871_QCSSGLQAVANIAGGIR_3+_F3
726.707	828.9	38.14	P05179_FINFVPTNLPHAVTCDIK_3+_F1
726.707	960	38.14	P05179_FINFVPTNLPHAVTCDIK_3+_F2
726.707	1132.5	38.14	P05179_FINFVPTNLPHAVTCDIK_3+_F3
612.673	843.5	38.03	P07153_VACITEQVLTLVNKR_3+_F1
612.673	869	38.03	P07153_VACITEQVLTLVNKR_3+_F2
612.673	1070.7	38.03	P07153_VACITEQVLTLVNKR_3+_F3
502.25	732.3	19.55	Q58FK9_ALSCLYGK_2+_F1
502.25	819.4	19.55	Q58FK9_ALSCLYGK_2+_F2
502.25	932.5	19.55	Q58FK9_ALSCLYGK_2+_F3
813.863	837.4	40.12	P17988_MKENCMTNYTTIPTEIMDHNVSPFMR_4+_F1
813.863	944.5	40.12	P17988_MKENCMTNYTTIPTEIMDHNVSPFMR_4+_F2
813.863	995	40.12	P17988_MKENCMTNYTTIPTEIMDHNVSPFMR_4+_F3
657.288	732.4	31.27	P11232_CMPTFQFYK_2+_F1
657.288	833.4	31.27	P11232_CMPTFQFYK_2+_F2
657.288	930.5	31.27	P11232_CMPTFQFYK_2+_F3
601.979	748.3	35.15	P57113_ALLALEAFQVSHPCR_3+_F1
601.979	847.4	35.15	P57113_ALLALEAFQVSHPCR_3+_F2
601.979	975.4	35.15	P57113_ALLALEAFQVSHPCR_3+_F3
1095.54	911.4	48.626	Q2LAM0_LAAGACWVR_1+_F1
1095.54	982.5	48.626	Q2LAM0_LAAGACWVR_1+_F2
1095.54	1078.5	48.626	Q2LAM0_LAAGACWVR_1+_F3
836.415	949.4	56.48	P00502_ALIDMYTEGILDLTEMIMQLVICPPDQK_4+_F1
836.415	1048.5	56.48	P00502_ALIDMYTEGILDLTEMIMQLVICPPDQK_4+_F2
836.415	1107.5	56.48	P00502_ALIDMYTEGILDLTEMIMQLVICPPDQK_4+_F3
1114.88	1161.6	56.48	P00502_ALIDMYTEGILDLTEMIMQLVICPPDQK_3+_F1
1114.88	1194.6	56.48	P00502_ALIDMYTEGILDLTEMIMQLVICPPDQK_3+_F2
1114.88	1220.6	56.48	P00502_ALIDMYTEGILDLTEMIMQLVICPPDQK_3+_F3
947.433	982.5	41.15	P04905_MQLIMLCYNPDFEK_2+_F1
947.433	1145.5	41.15	P04905_MQLIMLCYNPDFEK_2+_F2
947.433	1164.5	41.15	P04905_MQLIMLCYNPDFEK_2+_F3
631.958	730.4	41.15	P04905_MQLIMLCYNPDFEK_3+_F1
631.958	749.4	41.15	P04905_MQLIMLCYNPDFEK_3+_F2
631.958	912.4	41.15	P04905_MQLIMLCYNPDFEK_3+_F3
629.81	705.4	23.62	P04906_STCLYGQLPK_2+_F1
629.81	818.5	23.62	P04906_STCLYGQLPK_2+_F2
629.81	1070.5	23.62	P04906_STCLYGQLPK_2+_F3

## Sheet: Fr8
Q1	Q3	RT	ID
793.398	948.5	33.05	O09171_AGAAIVGVNCHFDPSTSLQTIK_3+_F1
793.398	974.6	33.05	O09171_AGAAIVGVNCHFDPSTSLQTIK_3+_F2
793.398	998	33.05	O09171_AGAAIVGVNCHFDPSTSLQTIK_3+_F3
595.301	602.4	33.03	O09171_AGAAIVGVNCHFDPSTSLQTIK_4+_F1
595.301	689.4	33.03	O09171_AGAAIVGVNCHFDPSTSLQTIK_4+_F2
595.301	790.5	33.03	O09171_AGAAIVGVNCHFDPSTSLQTIK_4+_F3
519.242	529.2	20.92	P36365_CIYFNTK_2+_F1
519.242	672.3	20.92	P36365_CIYFNTK_2+_F2
519.242	785.4	20.92	P36365_CIYFNTK_2+_F3
673.338	760.8	45.12	P36365_LALSIFFGPCTPYHFR_3+_F1
673.338	860.9	45.12	P36365_LALSIFFGPCTPYHFR_3+_F2
673.338	917.4	45.12	P36365_LALSIFFGPCTPYHFR_3+_F3
578.266	588.3	30.42	P36365_SCDLGGLWR_2+_F1
578.266	701.4	30.42	P36365_SCDLGGLWR_2+_F2
578.266	816.4	30.42	P36365_SCDLGGLWR_2+_F3
910.948	995.5	37.14	P29147_AVLVTGCDSGFGFSLAK_2+_F1
910.948	1028.5	37.14	P29147_AVLVTGCDSGFGFSLAK_2+_F2
910.948	1199.5	37.14	P29147_AVLVTGCDSGFGFSLAK_2+_F3
696.816	889.4	34.13	P29147_FGVEAFSDCLR_2+_F1
696.816	960.4	34.13	P29147_FGVEAFSDCLR_2+_F2
696.816	1089.5	34.13	P29147_FGVEAFSDCLR_2+_F3
658.857	753.4	45.06	P29147_GFLVFAGCLLK_2+_F1
658.857	900.5	45.06	P29147_GFLVFAGCLLK_2+_F2
658.857	999.5	45.06	P29147_GFLVFAGCLLK_2+_F3
439.574	658.9	45.04	P29147_GFLVFAGCLLK_3+_F1
439.574	753.4	45.04	P29147_GFLVFAGCLLK_3+_F2
439.574	900.5	45.04	P29147_GFLVFAGCLLK_3+_F3
827.949	983.6	41.23	P51647_IGPALSCGNTVVVKPAEQTPLTALHMASLIK_4+_F1
827.949	1074.1	41.23	P51647_IGPALSCGNTVVVKPAEQTPLTALHMASLIK_4+_F2
827.949	1084.6	41.23	P51647_IGPALSCGNTVVVKPAEQTPLTALHMASLIK_4+_F3
710.371	778.4	33.6	P15999_LYCIYVAIGQK_2+_F1
710.371	891.5	33.6	P15999_LYCIYVAIGQK_2+_F2
710.371	1143.6	33.6	P15999_LYCIYVAIGQK_2+_F3
1160.88	1179.6	48.59	P15999_YTIVVSATASDAAPLQYLAPYSGCSMGEYFR_3+_F1
1160.88	1187	48.59	P15999_YTIVVSATASDAAPLQYLAPYSGCSMGEYFR_3+_F2
1160.88	1198.5	48.59	P15999_YTIVVSATASDAAPLQYLAPYSGCSMGEYFR_3+_F3
870.909	1116	48.57	P15999_YTIVVSATASDAAPLQYLAPYSGCSMGEYFR_4+_F1
870.909	1179.6	48.57	P15999_YTIVVSATASDAAPLQYLAPYSGCSMGEYFR_4+_F2
870.909	1198.5	48.57	P15999_YTIVVSATASDAAPLQYLAPYSGCSMGEYFR_4+_F3
1173.22	1180.6	52.98	P11884_ANYLSQALQAGTVWINCYDVFGAQSPFGGYK_3+_F1
1173.22	1218.6	52.98	P11884_ANYLSQALQAGTVWINCYDVFGAQSPFGGYK_3+_F2
1173.22	1229.6	52.98	P11884_ANYLSQALQAGTVWINCYDVFGAQSPFGGYK_3+_F3
880.168	1011.5	52.96	P11884_ANYLSQALQAGTVWINCYDVFGAQSPFGGYK_4+_F1
880.168	1101	52.96	P11884_ANYLSQALQAGTVWINCYDVFGAQSPFGGYK_4+_F2
880.168	1158.6	52.96	P11884_ANYLSQALQAGTVWINCYDVFGAQSPFGGYK_4+_F3
938.142	956.5	52.44	P11884_HEPVGVCGQIIPWNFPLLMQAWK_3+_F1
938.142	1056.5	52.44	P11884_HEPVGVCGQIIPWNFPLLMQAWK_3+_F2
938.142	1133.6	52.44	P11884_HEPVGVCGQIIPWNFPLLMQAWK_3+_F3
703.858	765.9	52.44	P11884_HEPVGVCGQIIPWNFPLLMQAWK_4+_F1
703.858	822.4	52.44	P11884_HEPVGVCGQIIPWNFPLLMQAWK_4+_F2
703.858	986.5	52.44	P11884_HEPVGVCGQIIPWNFPLLMQAWK_4+_F3
1027.24	1149.6	37.14	P10860_EMSWIADTYASTIGHYDINAHACVTGKPISQGGIHGR_4+_F1
1027.24	1206.7	37.14	P10860_EMSWIADTYASTIGHYDINAHACVTGKPISQGGIHGR_4+_F2
1027.24	1222.1	37.14	P10860_EMSWIADTYASTIGHYDINAHACVTGKPISQGGIHGR_4+_F3
993.553	816.4	33.48	P10860_IIKPCNHVLSLSFPIR_2+_F1
993.553	1031.6	33.48	P10860_IIKPCNHVLSLSFPIR_2+_F2
993.553	1167.6	33.48	P10860_IIKPCNHVLSLSFPIR_2+_F3
662.705	816.4	33.46	P10860_IIKPCNHVLSLSFPIR_3+_F1
662.705	880.5	33.46	P10860_IIKPCNHVLSLSFPIR_3+_F2
662.705	932.6	33.46	P10860_IIKPCNHVLSLSFPIR_3+_F3
497.28	532.2	33.46	P10860_IIKPCNHVLSLSFPIR_4+_F1
497.28	619.4	33.46	P10860_IIKPCNHVLSLSFPIR_4+_F2
497.28	727.9	33.46	P10860_IIKPCNHVLSLSFPIR_4+_F3
643.324	710.3	33.56	P04041_YIIWSPVCR_2+_F1
643.324	896.4	33.56	P04041_YIIWSPVCR_2+_F2
643.324	1009.5	33.56	P04041_YIIWSPVCR_2+_F3
429.218	526.2	33.54	P04041_YIIWSPVCR_3+_F1
429.218	623.3	33.54	P04041_YIIWSPVCR_3+_F2
429.218	710.3	33.54	P04041_YIIWSPVCR_3+_F3
550.284	641.3	31.84	P04797_VPTPNVSVVDLTCR_3+_F1
550.284	756.3	31.84	P04797_VPTPNVSVVDLTCR_3+_F2
550.284	794.4	31.84	P04797_VPTPNVSVVDLTCR_3+_F3
580.751	736.4	12.9	P13444_TACYGHFGR_2+_F1
580.751	988.4	12.9	P13444_TACYGHFGR_2+_F2
580.751	1059.4	12.9	P13444_TACYGHFGR_2+_F3
621.805	700.4	20.34	Q63716_HGEVCPAGWKPGSDTIKPDVNK_4+_F1
621.805	900.4	20.34	Q63716_HGEVCPAGWKPGSDTIKPDVNK_4+_F2
621.805	1086.4	20.34	Q63716_HGEVCPAGWKPGSDTIKPDVNK_4+_F3
497.645	572.3	20.34	Q63716_HGEVCPAGWKPGSDTIKPDVNK_5+_F1
497.645	675.3	20.34	Q63716_HGEVCPAGWKPGSDTIKPDVNK_5+_F2
497.645	700.4	20.34	Q63716_HGEVCPAGWKPGSDTIKPDVNK_5+_F3
1062.52	1110.5	54.66	Q63716_YVVFFFYPLDFTFVCPTEIIAFSDR_3+_F1
1062.52	1148.6	54.66	Q63716_YVVFFFYPLDFTFVCPTEIIAFSDR_3+_F2
1062.52	1239.6	54.66	Q63716_YVVFFFYPLDFTFVCPTEIIAFSDR_3+_F3
842.401	888.5	32.94	Q8VIF7_FLHDPDATQGFVGCALSSNIQR_3+_F1
842.401	1140.5	32.94	Q8VIF7_FLHDPDATQGFVGCALSSNIQR_3+_F2
842.401	1197.6	32.94	Q8VIF7_FLHDPDATQGFVGCALSSNIQR_3+_F3
925.917	631.2	40.32	P27867_YCNTWPMAVSMLASK_2+_F1
925.917	817.3	40.32	P27867_YCNTWPMAVSMLASK_2+_F2
925.917	1034.5	40.32	P27867_YCNTWPMAVSMLASK_2+_F3
617.614	735.4	40.32	P27867_YCNTWPMAVSMLASK_3+_F1
617.614	806.4	40.32	P27867_YCNTWPMAVSMLASK_3+_F2
617.614	1034.5	40.32	P27867_YCNTWPMAVSMLASK_3+_F3
936.555	959.5	52.42	P27867_VLVCGAGPIGIVTLLVAK_2+_F1
936.555	1123.4	52.42	P27867_VLVCGAGPIGIVTLLVAK_2+_F2
936.555	1180.6	52.42	P27867_VLVCGAGPIGIVTLLVAK_2+_F3
555.494	671.8	21.94	P27867_MHSVGICGSDVHYWEHGR_4+_F1
555.494	684.3	21.94	P27867_MHSVGICGSDVHYWEHGR_4+_F2
555.494	847.4	21.94	P27867_MHSVGICGSDVHYWEHGR_4+_F3
645.811	819.4	22.63	P09118_HVHAFIHTPTGTHFCDVEQVR_4+_F1
645.811	997.4	22.63	P09118_HVHAFIHTPTGTHFCDVEQVR_4+_F2
645.811	1144.5	22.63	P09118_HVHAFIHTPTGTHFCDVEQVR_4+_F3
677.068	849.9	52.72	P09118_SIETFAMNICEHFLSSFSHVTR_4+_F1
677.068	920.5	52.72	P09118_SIETFAMNICEHFLSSFSHVTR_4+_F2
677.068	1180.6	52.72	P09118_SIETFAMNICEHFLSSFSHVTR_4+_F3
1005.73	1105.5	47.9	P28037_EGATLVCGGNQVPRPGFFFQPTVFTDVEDHMYIAK_4+_F1
1005.73	1179.5	47.9	P28037_EGATLVCGGNQVPRPGFFFQPTVFTDVEDHMYIAK_4+_F2
1005.73	1220.6	47.9	P28037_EGATLVCGGNQVPRPGFFFQPTVFTDVEDHMYIAK_4+_F3
894.449	1005.5	53.62	P28037_EPVGVCGIVIPWNYPLMMLSWK_3+_F1
894.449	1168.6	53.62	P28037_EPVGVCGIVIPWNYPLMMLSWK_3+_F2
894.449	1282.6	53.62	P28037_EPVGVCGIVIPWNYPLMMLSWK_3+_F3
1087.06	1114.6	42.1	P28037_IAVIGQSLFGQEVYCQLR_2+_F1
1087.06	1187.6	42.1	P28037_IAVIGQSLFGQEVYCQLR_2+_F2
1087.06	1244.6	42.1	P28037_IAVIGQSLFGQEVYCQLR_2+_F3
485.737	560.3	13.72	P28037_SCALSNVK_2+_F1
485.737	631.4	13.72	P28037_SCALSNVK_2+_F2
485.737	883.4	13.72	P28037_SCALSNVK_2+_F3
867.488	961.1	35.89	P28037_TAACLAAGNTVVIKPAQVTPLTALK_3+_F1
867.488	996.6	35.89	P28037_TAACLAAGNTVVIKPAQVTPLTALK_3+_F2
867.488	1138.7	35.89	P28037_TAACLAAGNTVVIKPAQVTPLTALK_3+_F3
650.867	740	38.23	P28037_TAACLAAGNTVVIKPAQVTPLTALK_4+_F1
650.867	789.5	38.23	P28037_TAACLAAGNTVVIKPAQVTPLTALK_4+_F2
650.867	1138.7	38.23	P28037_TAACLAAGNTVVIKPAQVTPLTALK_4+_F3
569.737	757.3	24.26	P28037_YFAGWCDK_2+_F1
569.737	828.3	24.26	P28037_YFAGWCDK_2+_F2
569.737	975.4	24.26	P28037_YFAGWCDK_2+_F3
804.885	1016.4	22.26	P04785_ITQFCHHFLEGK_2+_F1
804.885	1119.5	22.26	P04785_ITQFCHHFLEGK_2+_F2
804.885	1163.5	22.26	P04785_ITQFCHHFLEGK_2+_F3
1003	1053.5	42	Q64591_AMTTFLSSLGAQCVIASR_2+_F1
1003	1080.5	42	Q64591_AMTTFLSSLGAQCVIASR_2+_F2
1003	1166.6	42	Q64591_AMTTFLSSLGAQCVIASR_2+_F3
669.001	797.4	42.02	Q64591_AMTTFLSSLGAQCVIASR_3+_F1
669.001	925.5	42.02	Q64591_AMTTFLSSLGAQCVIASR_3+_F2
669.001	1053.5	42.02	Q64591_AMTTFLSSLGAQCVIASR_3+_F3
620.295	709.3	19.14	P46953_ASFQPPVCNK_2+_F1
620.295	806.4	19.14	P46953_ASFQPPVCNK_2+_F2
620.295	934.4	19.14	P46953_ASFQPPVCNK_2+_F3
569.8	660.4	31.78	P30904_LLCGLLSDR_2+_F1
569.8	762.4	31.78	P30904_LLCGLLSDR_2+_F2
569.8	912.4	31.78	P30904_LLCGLLSDR_2+_F3
380.202	490.3	31.76	P30904_LLCGLLSDR_3+_F1
380.202	536.3	31.76	P30904_LLCGLLSDR_3+_F2
380.202	660.4	31.76	P30904_LLCGLLSDR_3+_F3
623.288	688.3	21.2	P23457_SIGVSNFNCR_2+_F1
623.288	889.4	21.2	P23457_SIGVSNFNCR_2+_F2
623.288	1045.5	21.2	P23457_SIGVSNFNCR_2+_F3
612.673	843.5	38.14	P07153_VACITEQVLTLVNKR_3+_F1
612.673	869	38.14	P07153_VACITEQVLTLVNKR_3+_F2
612.673	1070.7	38.14	P07153_VACITEQVLTLVNKR_3+_F3
1114.88	1161.6	56.48	P00502_ALIDMYTEGILDLTEMIMQLVICPPDQK_3+_F1
1114.88	1194.6	56.48	P00502_ALIDMYTEGILDLTEMIMQLVICPPDQK_3+_F2
1114.88	1220.6	56.48	P00502_ALIDMYTEGILDLTEMIMQLVICPPDQK_3+_F3
585.287	618.4	29.25	P04905_P08010_CLDAFPNLK_2+_F1
585.287	689.4	29.25	P04905_P08010_CLDAFPNLK_2+_F2
585.287	804.4	29.25	P04905_P08010_CLDAFPNLK_2+_F3
947.433	982.5	41.41	P04905_MQLIMLCYNPDFEK_2+_F1
947.433	1145.5	41.41	P04905_MQLIMLCYNPDFEK_2+_F2
947.433	1164.5	41.41	P04905_MQLIMLCYNPDFEK_2+_F3
